# Supplementary material for: Enhanced inhibition of tumor growth using TRAIL-overexpressing adipose-derived stem cells in combination with the chemotherapeutic agent CPT-11 in castration-resistant prostate cancer
Source: PubMed Central journal article supplement — Prostate Int. 2020 Jul 31;9(1):31–41. doi: 10.1016/j.prnil.2020.07.002 (PMC8053698; doi:10.1016/j.prnil.2020.07.002), 2020-07-31

# CERTIFICATE OF EDITING

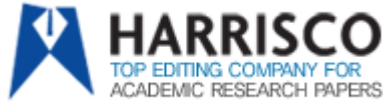

*Scientific English Research Paper Editing Service*  
1108, Hwanghwa B/D, 832-7, Yeoksam-Dong Kangnam-Ku  
Seoul, the Republic of Korea  
Tel : 82-2-557-1810~1  
<http://en.harrisco.net>

The following manuscript was proofread and edited by  
the professional English editors at HARRISCO.

## **Manuscript Title :**

Enhanced inhibition of tumor growth using TRAIL-overexpressing adipose-derived stem cells in combination  
with chemotherapeutic agent CPT-11 in castration-resistant prostate cancer

## **Manuscript Authors :**

Jae Heon Kim

## **Date of Issue: :**

June 26, 2020

Yours truly,

HARRISCO

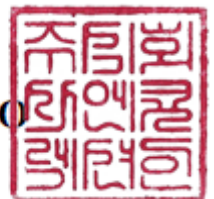

Supplement: mmc1.pdf [file mmc1.pdf]
